# Supplementary material
Source: PubMed Central journal article supplement (PMC2759813)
Supplement: ja906557v_si_001.pdf [file ja906557v_si_001.pdf]

**Supporting Information for:**

Efficient and Rapid Template-Directed Nucleic Acid Copying using 2'-amino-2', 3'-  
dideoxyribonucleoside-5'-phosphorimidazolide Monomers

*Jason P. Schrum, Alonso Ricardo, Mathangi Krishnamurthy, Craig Blain and Jack W.*

*Szostak\**

\* E-mail: [szostak@molbio.mgh.harvard.edu](mailto:szostak@molbio.mgh.harvard.edu)

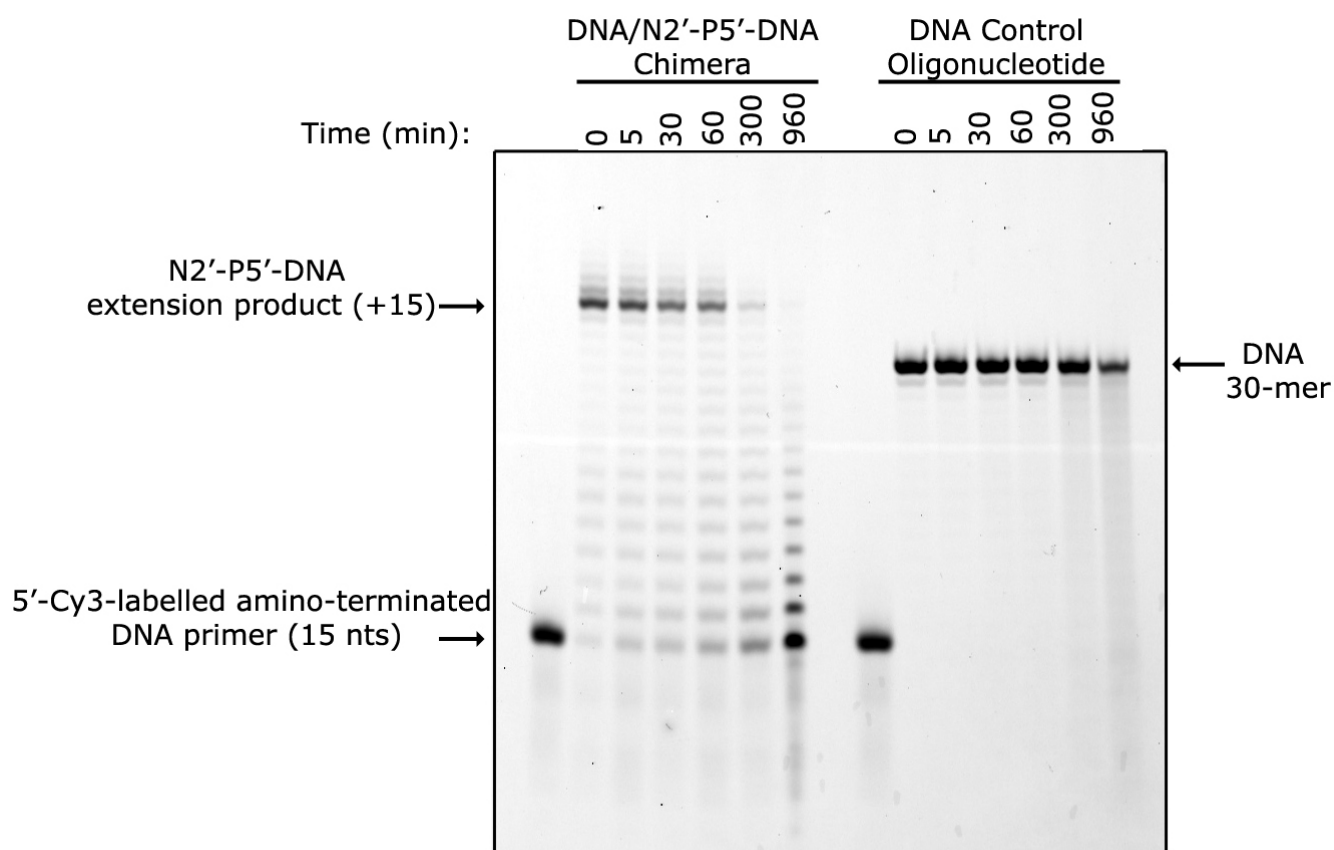

**Figure S1.** Acid sensitivity of N2'→P5'-DNA primer-extension product. 0.1μM Cy3-labelled amino-terminated primer was extended on a dC<sub>15</sub> template with 5mM 2'-NH<sub>2</sub>-ImpddG as previously described. The primer-extension reaction was ethanol precipitated to remove buffer components and excess imidazole and subjected to 80% acetic acid hydrolysis according to the time course as indicated. For comparison, a DNA 30-mer (5'-Cy3-GCGTAGACTGACTGGAAAAAAAAAAAAAAAAA) was also subjected to 80% acetic acid for the given time course.

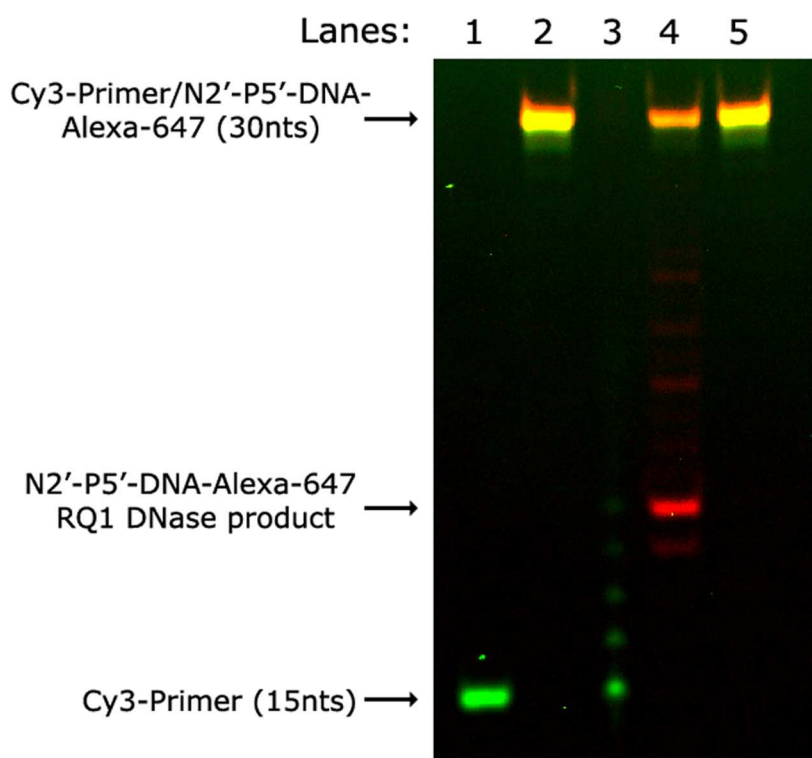

**Figure S2.** High resolution gel electrophoresis analysis of N2'→P5'-DNA-G<sub>15</sub> primer-extension product chemical and enzymatic digestion reactions. 0.1μM Cy3-labelled amino-terminated primer was extended on a dC<sub>15</sub> template with 5mM 2'-NH<sub>2</sub>-ImpddG as previously described. The primer-extension reaction was ethanol precipitated and the new 2'-amino-terminus was reacted with the Alexa-647-succinimidyl ester. The resulting 5'-Cy3-DNA/N2'→P5'-DNA-2'-Alexa-647 double labeled oligonucleotide was polyacrylamide gel purified. Lanes: 1) primer alone; 2) 5'-Cy3-DNA/N2'→P5'-DNA-2'-Alexa-647 double labeled oligonucleotide; 3) 80% acetic acid hydrolysis; 4) RQ1 DNase digestion; 5) RNase I<sub>f</sub> digestion. Enzymatic digestion reactions are described in the experimental section.

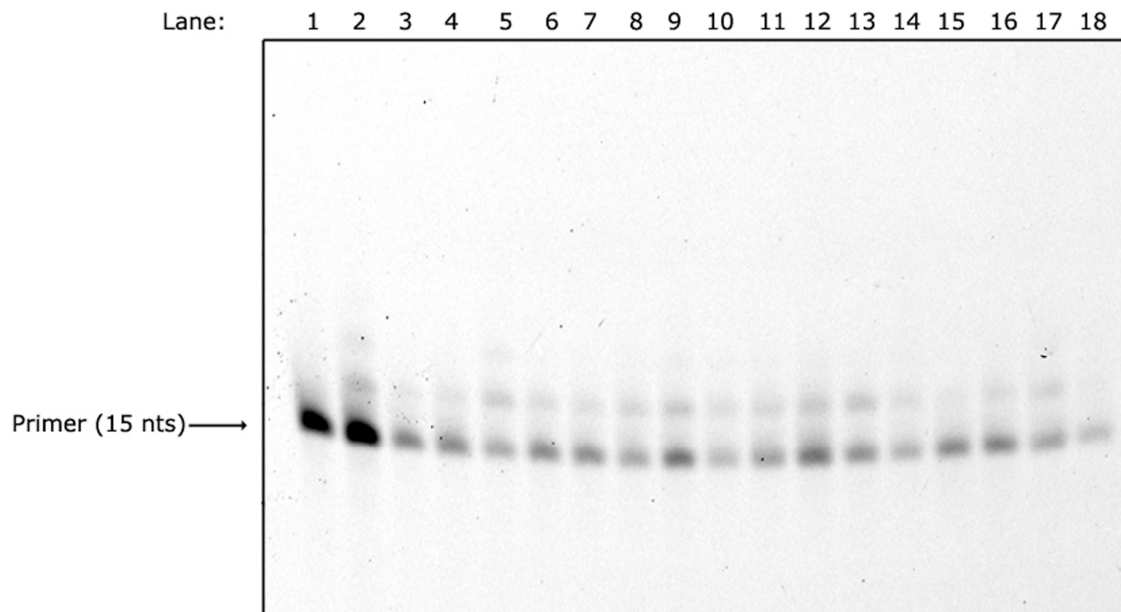

**Figure S3.** High resolution gel electrophoresis analysis of 2'-NH<sub>2</sub>-ImpddG non-complementary template copying reactions. Primer-extension reactions contained 0.1 μM Cy3-labeled-2'-amino-terminated DNA primer, 0.5 μM non-complementary template, 100mM MES-CAPS-HEPES, pH 7.5, 100mM 1-(2-hydroxyethyl)-imidazole and 5mM 2'-NH<sub>2</sub>-ImpddG. The reaction was completed as previously described and incubated at 4°C for 3 hours.

| <u>Lane</u> | <u>Template</u>          | <u>Sequence</u>                                                                   |
|-------------|--------------------------|-----------------------------------------------------------------------------------|
| 1           | primer alone             |                                                                                   |
| 2           | no template              |                                                                                   |
| 3           | DNA                      | 5' - CAAAAGCAGTCAGTCTACGC                                                         |
| 4           | DNA                      | 5' - CDDDDGCAGTCAGTCTACGC                                                         |
| 5           | DNA                      | 5' - TGGGGGCAGTCAGTCTACGC                                                         |
| 6           | DNA                      | 5' - ATTTTGCAGTCAGTCTACGC                                                         |
| 7           | DNA                      | 5' - CU <sup>P</sup> U <sup>P</sup> U <sup>P</sup> U <sup>P</sup> GCAGTCAGTCTACGC |
| 8           | RNA                      | 5' - CAAAAGCAGUCAGUCUACGC                                                         |
| 9           | RNA                      | 5' - CDDDDGCAGUCAGUCUACGC                                                         |
| 10          | RNA                      | 5' - UGGGGGCAGUCAGUCUACGC                                                         |
| 11          | RNA                      | 5' - AUUUUGCAGUCAGUCUACGC                                                         |
| 12          | RNA                      | 5' - AU <sup>P</sup> U <sup>P</sup> U <sup>P</sup> U <sup>P</sup> GCAGUCAGUCUACGC |
| 13          | LNA (underlined)         | 5' - <u>CAAAA</u> GCAGTCAGTCTACGC                                                 |
| 14          | LNA (underlined)         | 5' - <u>TGGGG</u> GCAGTCAGTCTACGC                                                 |
| 15          | LNA (underlined)         | 5' - <u>ATTTT</u> GCAGTCAGTCTACGC                                                 |
| 16          | O2'→P5'-DNA (underlined) | 5' - <u>CAAAA</u> GCAGTCAGTCTACGC                                                 |
| 17          | O2'→P5'-DNA (underlined) | 5' - <u>TGGGG</u> GCAGTCAGTCTACGC                                                 |
| 18          | O2'→P5'-DNA (underlined) | 5' - <u>ATTTT</u> GCAGTCAGTCTACGC                                                 |

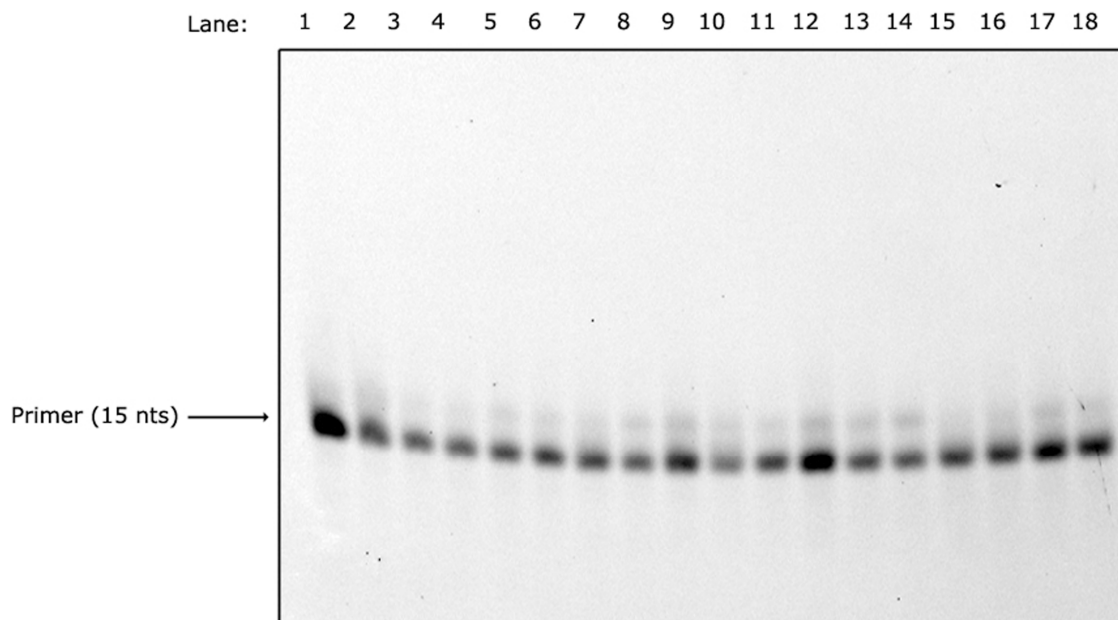

**Figure S4.** High resolution gel electrophoresis analysis of 2'-NH<sub>2</sub>-ImpddC non-complementary template copying reactions. Primer-extension reactions were run as previously described with 0.5μM non-complementary template and 5mM 2'-NH<sub>2</sub>-ImpddC. The reaction was completed as previously described and incubated at 4°C for 3 hours.

| <u>Lane</u> | <u>Template</u>          | <u>Sequence</u>                                                                   |
|-------------|--------------------------|-----------------------------------------------------------------------------------|
| 1           | primer alone             |                                                                                   |
| 2           | no template              |                                                                                   |
| 3           | DNA                      | 5' - CAAAAGCAGTCAGTCTACGC                                                         |
| 4           | DNA                      | 5' - CDDDDGCAGTCAGTCTACGC                                                         |
| 5           | DNA                      | 5' - ACCCCGCAGTCAGTCTACGC                                                         |
| 6           | DNA                      | 5' - ATTTTGCAGTCAGTCTACGC                                                         |
| 7           | DNA                      | 5' - CU <sup>P</sup> U <sup>P</sup> U <sup>P</sup> U <sup>P</sup> GCAGTCAGTCTACGC |
| 8           | RNA                      | 5' - CAAAAGCAGUCAGUCUACGC                                                         |
| 9           | RNA                      | 5' - CDDDDGCAGUCAGUCUACGC                                                         |
| 10          | RNA                      | 5' - ACCCCGCAGUCAGUCUACGC                                                         |
| 11          | RNA                      | 5' - AUUUUGCAGUCAGUCUACGC                                                         |
| 12          | RNA                      | 5' - AU <sup>P</sup> U <sup>P</sup> U <sup>P</sup> U <sup>P</sup> GCAGUCAGUCUACG  |
| 13          | LNA (underlined)         | 5' - <u>CAAAA</u> GCAGTCAGTCTACGC                                                 |
| 14          | LNA (underlined)         | 5' - <u>ACCCC</u> GCAGTCAGTCTACGC                                                 |
| 15          | LNA (underlined)         | 5' - <u>ATTTT</u> GCAGTCAGTCTACGC                                                 |
| 16          | O2'→P5'-DNA (underlined) | 5' - <u>CAAAA</u> GCAGTCAGTCTACGC                                                 |
| 17          | O2'→P5'-DNA (underlined) | 5' - <u>ACCCC</u> GCAGTCAGTCTACGC                                                 |
| 18          | O2'→P5'-DNA (underlined) | 5' - <u>ATTTT</u> GCAGTCAGTCTACGC                                                 |

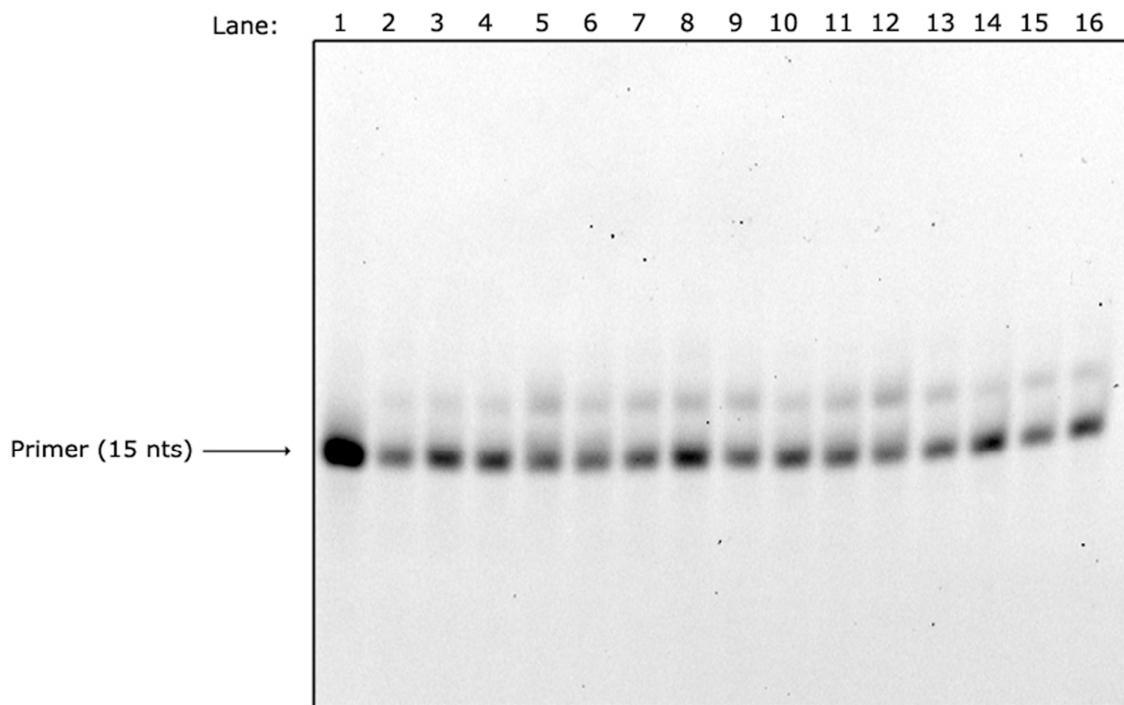

**Figure S5.** High resolution gel electrophoresis analysis of 2'-NH<sub>2</sub>-ImpddD non-complementary template copying reactions. Primer-extension reactions were run as previously described with 0.5 μM non-complementary template and 5mM 2'-NH<sub>2</sub>-ImpddD. The reaction was completed as previously described and incubated at 4°C for 3 hours.

| <u>Lane</u> | <u>Template</u>          | <u>Sequence</u>                   |
|-------------|--------------------------|-----------------------------------|
| 1           | primer alone             |                                   |
| 2           | no template              |                                   |
| 3           | DNA                      | 5' - CAAAAGCAGTCAGTCTACGC         |
| 4           | DNA                      | 5' - CDDDDGCAGTCAGTCTACGC         |
| 5           | DNA                      | 5' - ACCCCGCAGTCAGTCTACGC         |
| 6           | DNA                      | 5' - TGGGGGCAGTCAGTCTACGC         |
| 7           | RNA                      | 5' - CAAAAGCAGUCAGUCUACGC         |
| 8           | RNA                      | 5' - CDDDDGCAGUCAGUCUACGC         |
| 9           | RNA                      | 5' - ACCCCGCAGUCAGUCUACGC         |
| 10          | RNA                      | 5' - UGGGGGCAGUCAGUCUACGC         |
| 11          | LNA (underlined)         | 5' - <u>CAAAA</u> GCAGTCAGTCTACGC |
| 12          | LNA (underlined)         | 5' - <u>ACCCC</u> GCAGTCAGTCTACGC |
| 13          | LNA (underlined)         | 5' - <u>TGGGG</u> GCAGTCAGTCTACGC |
| 14          | O2'→P5'-DNA (underlined) | 5' - <u>CAAAA</u> GCAGTCAGTCTACGC |
| 15          | O2'→P5'-DNA (underlined) | 5' - <u>ACCCC</u> GCAGTCAGTCTACGC |
| 16          | O2'→P5'-DNA (underlined) | 5' - <u>TGGGG</u> GCAGTCAGTCTACGC |

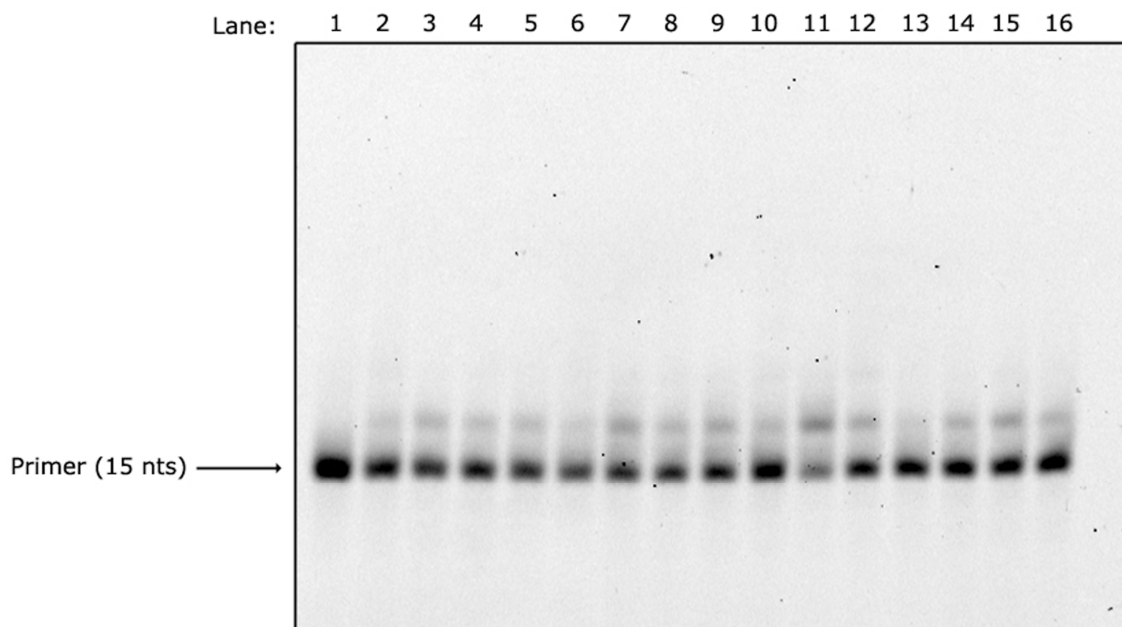

**Figure S6.** High resolution gel electrophoresis analysis of 2'-NH<sub>2</sub>-ImpddU<sup>P</sup> non-complementary template copying reactions. Primer-extension reactions were run as previously described with 0.5μM non-complementary template and 5mM 2'-NH<sub>2</sub>-ImpddU<sup>P</sup>. The reaction was completed as previously described and incubated at 4°C for 3 hours.

| <u>Lane</u> | <u>Template</u>          | <u>Sequence</u>                                                        |
|-------------|--------------------------|------------------------------------------------------------------------|
| 1           | primer alone             |                                                                        |
| 2           | no template              |                                                                        |
| 3           | DNA                      | 5' - <u>ACCCCGCAGTCAGTCTACGC</u>                                       |
| 4           | DNA                      | 5' - <u>TGGGGGCAGTCAGTCTACGC</u>                                       |
| 5           | DNA                      | 5' - <u>ATTTTGCAGTCAGTCTACGC</u>                                       |
| 6           | DNA                      | 5' - <u>CUP<sup>P</sup>UP<sup>P</sup>UP<sup>P</sup>GCAGTCAGTCTACGC</u> |
| 7           | RNA                      | 5' - <u>ACCCCGCAGUCAGUCUACGC</u>                                       |
| 8           | RNA                      | 5' - <u>UGGGGGCAGUCAGUCUACGC</u>                                       |
| 9           | RNA                      | 5' - <u>AUUUUGCAGUCAGUCUACGC</u>                                       |
| 10          | RNA                      | 5' - <u>AUP<sup>P</sup>UP<sup>P</sup>UP<sup>P</sup>GCAGUCAGUCUACGC</u> |
| 11          | LNA (underlined)         | 5' - <u>ACCCCGCAGTCAGTCTACGC</u>                                       |
| 12          | LNA (underlined)         | 5' - <u>TGGGGGCAGTCAGTCTACGC</u>                                       |
| 13          | LNA (underlined)         | 5' - <u>ATTTTGCAGTCAGTCTACGC</u>                                       |
| 14          | O2'→P5'-DNA (underlined) | 5' - <u>ACCCCGCAGTCAGTCTACGC</u>                                       |
| 15          | O2'→P5'-DNA (underlined) | 5' - <u>TGGGGGCAGTCAGTCTACGC</u>                                       |
| 16          | O2'→P5'-DNA (underlined) | 5' - <u>ATTTTGCAGTCAGTCTACGC</u>                                       |

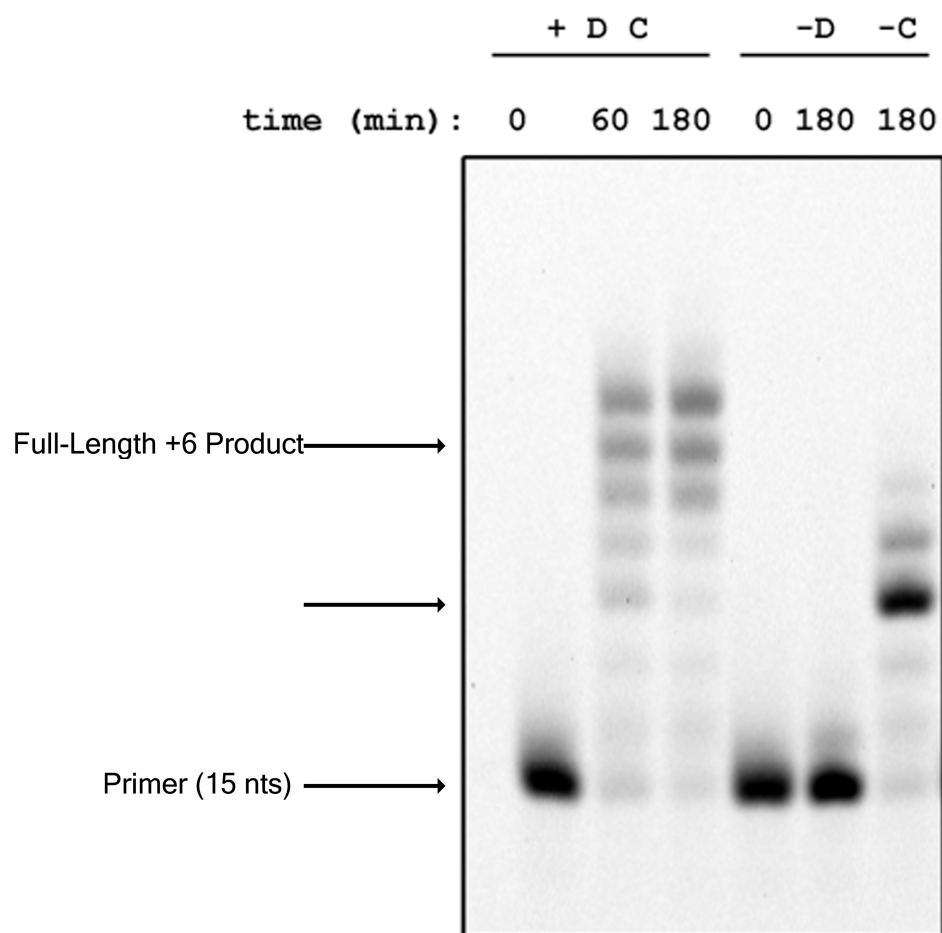

**Figure S7.** High resolution polyacrylamide gel analysis of mixed sequence RNA template copying reaction. Primer-extension reaction contained 0.1 $\mu$ M Cy3-labeled-2'-amino-terminated DNA primer, 0.5 $\mu$ M template (5'- GGGU<sup>P</sup>U<sup>P</sup>U<sup>P</sup> -3'-primer binding site), 100mM MES-CAPS-HEPES, pH 7.5, 100mM 1-(2-hydroxyethyl)-imidazole, 1mM 2'-NH<sub>2</sub>-ImpddC and 5mM 2'-NH<sub>2</sub>-ImpddD. The reaction was completed as previously described and incubated at 4°C for the indicated time. Arrows indicate primer, full-length product and stalled products.



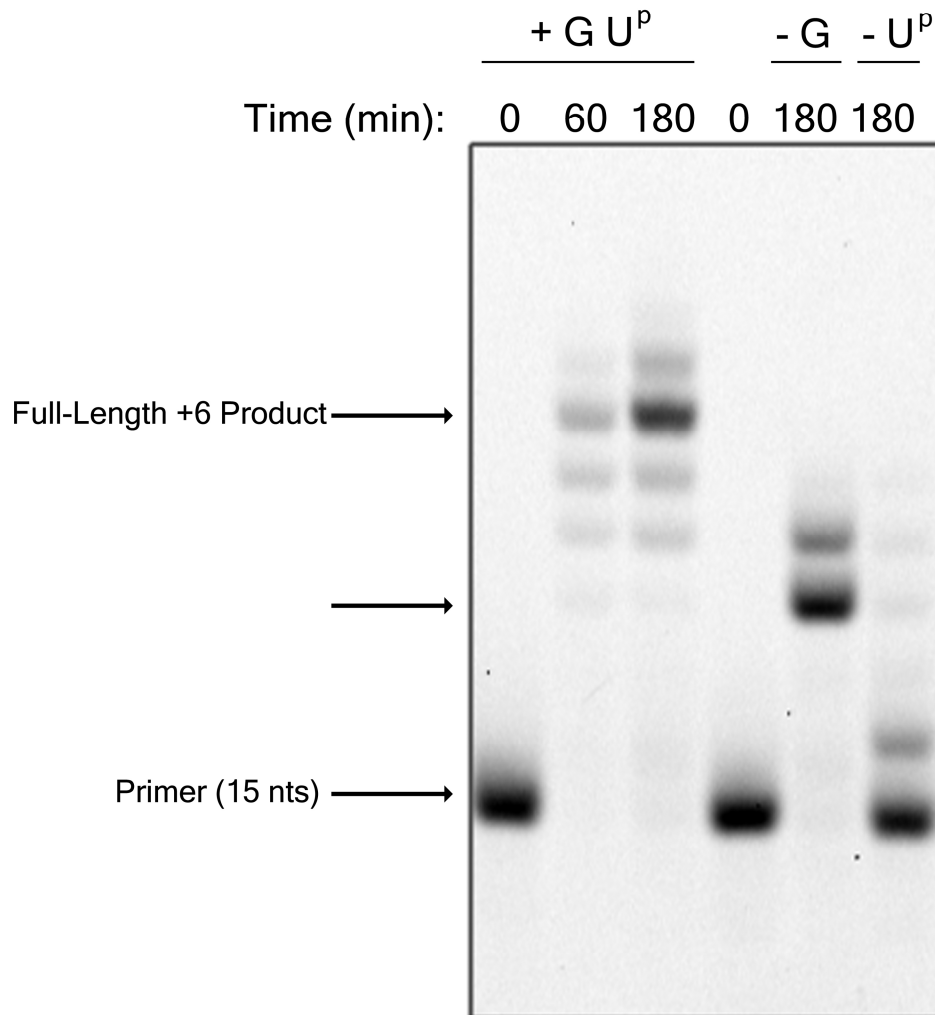

**Figure S8.** High resolution polyacrylamide gel analysis of mixed sequence RNA template copying reaction. Primer-extension reaction contained 0.1 $\mu$ M Cy3-labeled-2'-amino-terminated DNA primer, 0.5 $\mu$ M template (5'-CCCDDD-3'-primer binding site), 100mM MES-CAPS-HEPES, pH 7.5, 100mM 1-(2-hydroxyethyl)-imidazole, 1mM 2'-NH<sub>2</sub>-ImpddG and 5mM 2'-NH<sub>2</sub>-ImpddU<sup>P</sup>. The reaction was completed as previously described and incubated at 4°C for the indicated time. Arrows indicate primer, full-length product and stalled products.

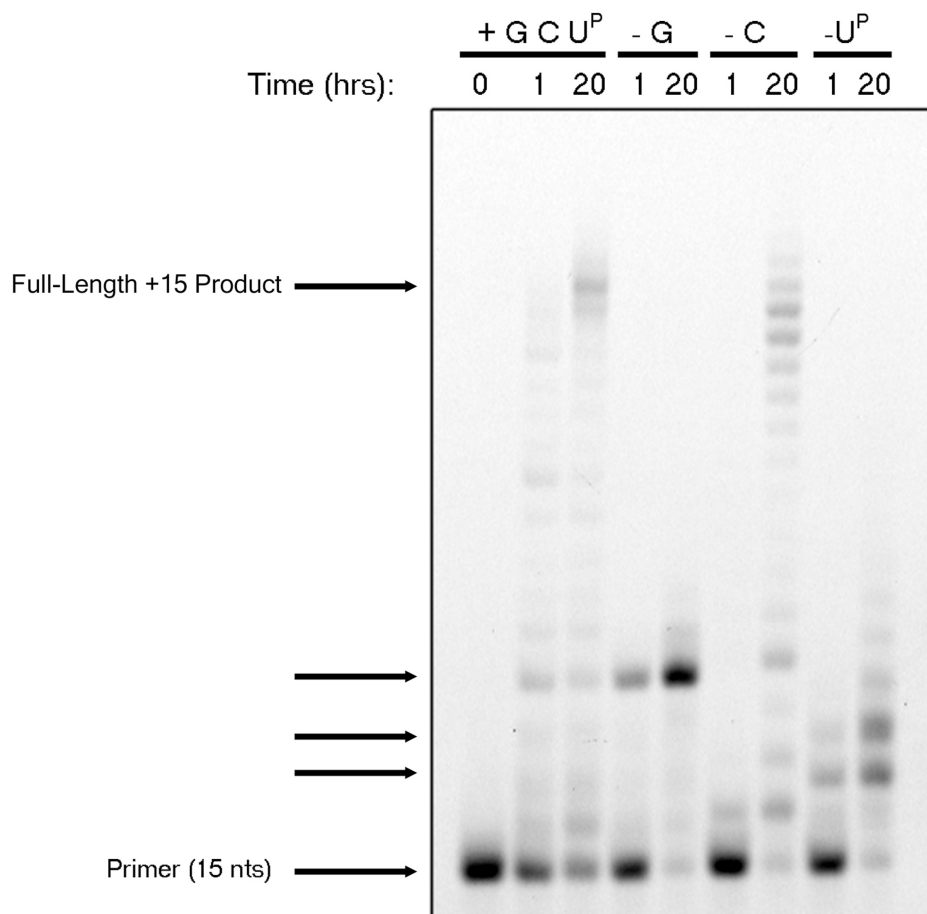

**Figure S9.** High resolution polyacrylamide gel analysis of mixed sequence RNA template copying reaction. Primer-extension reaction contained 0.1 $\mu$ M Cy3-labeled-2'-amino-terminated DNA primer, 0.5 $\mu$ M template (5'- GGDDCCDDCCCDDGG-3'-primer binding site), 100mM MES-CAPS-HEPES, pH 7.5, 100mM 1-(2-hydroxyethyl)-imidazole, 5mM 2'-NH<sub>2</sub>-ImpddC, 5mM 2'-NH<sub>2</sub>-ImpddG and 5mM 2'-NH<sub>2</sub>-ImpddU<sup>P</sup>. The reaction was completed as previously described and incubated at 4°C for the indicated time. Arrows indicate primer, full-length product and stalled products.

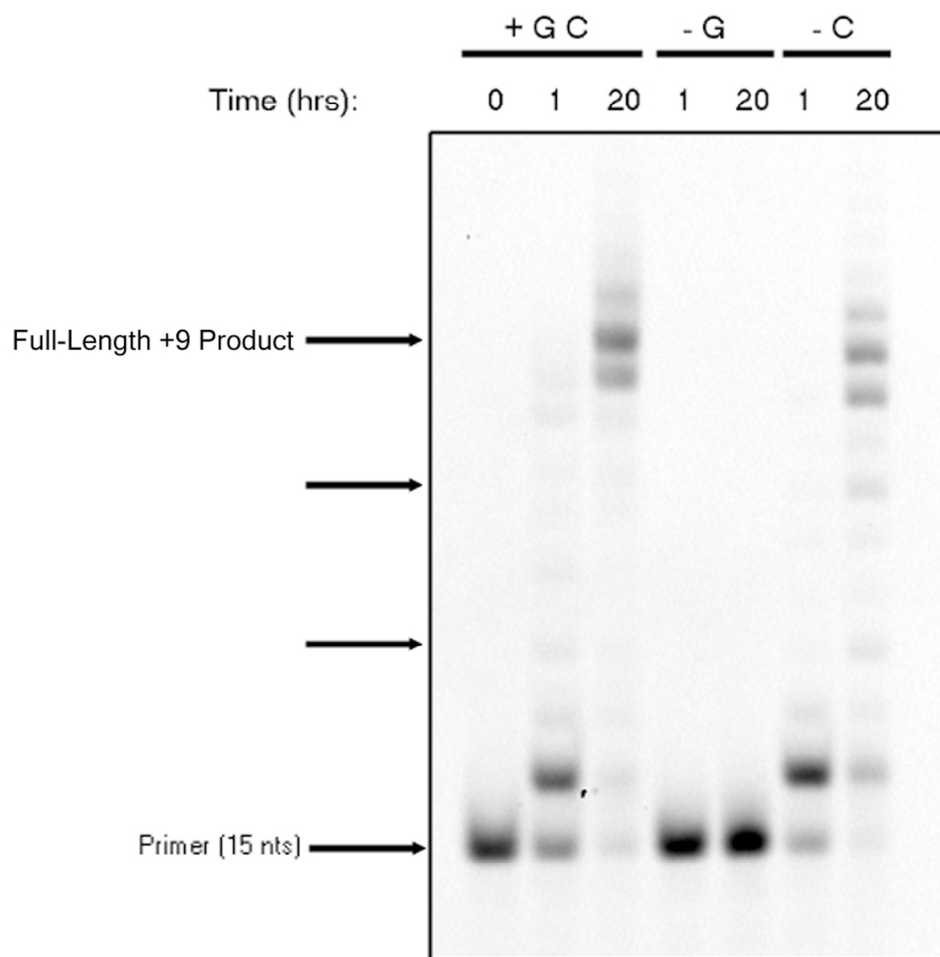

**Figure S10.** High resolution polyacrylamide gel analysis of mixed sequence RNA template copying reaction. Primer-extension reaction contained 0.1 $\mu$ M Cy3-labeled-2'-amino-terminated DNA primer, 0.5 $\mu$ M template (5'-AGCCGCCGCC-3'-primer binding site), 100mM MES-CAPS-HEPES, pH 7.5, 100mM 1-(2-hydroxyethyl)-imidazole, 5mM 2'-NH<sub>2</sub>-ImpddC and 5mM 2'-NH<sub>2</sub>-ImpddG. The reaction was completed as previously described and incubated at 4°C for the indicated time. Arrows indicate primer, full-length product and stalled products.

## Supporting Information Experimental Section

### Phosphoramidate DNA Sensitivity to Acid, DNase, and RNase.

Phosphoramidate extension product acid lability was demonstrated by extending 0.1  $\mu$ M Cy3-labelled 2'-amino-terminated primer on 0.5  $\mu$ M dC<sub>15</sub> DNA template oligonucleotide in 150 mM NaCl, 100 mM 1-(2-hydroxyethyl)-imidazole, 100 mM Na-MES-CAPS-HEPES, pH 7.5 with 5mM 2'-amino-2',3'-dideoxyguanosine-5'-phosphorimidazolide at 4 °C. The extension reaction mixture was ethanol precipitated and hydrolyzed with 80% acetic acid at room temperature for various time points. For comparison, a DNA control oligonucleotide was subjected to 80% acetic acid treatment. Hydrolysis products were compared and analyzed by polyacrylamide gel electrophoresis as previously described.

N2'→P5'-phosphoramidate DNA enzymatic resistance to RQ1 DNase and RNase I<sub>f</sub> was shown by extending 0.1  $\mu$ M Cy3-labelled 2'-amino-terminated DNA primer on 0.5  $\mu$ M dC<sub>15</sub> DNA template oligonucleotide with 2'-amino-2',3'-dideoxynucleoside-5'-phosphorimidazolide as described, reacting the new 2'-amino-terminus with the Alexa 647-succinimidyl ester (Invitrogen), polyacrylamide gel purified the doubled labeled oligonucleotide (5'-Cy3-GCGTAGACTGACTGGGGGGGGGGGGGGGGGGGG-2'-Alexa 647; phosphoramidate linkages underlined), and treated with RQ1 DNase or RNase I<sub>f</sub> for 30 minutes at 37 °C. Digestion products were analyzed by polyacrylamide gel electrophoresis shown in figure S2.
